# Supplementary material for: Plants or bacteria? 130 years of mixed imprints in Lake Baldegg sediments (Switzerland), as revealed by compound-specific isotope analysis (CSIA) and biomarker analysis
Source: Copernicus journal article supplement (doi:10.5194/bg-2018-288), 2018-07-19
Supplement: Supplementary file 1 [file bg-2018-288-supplement.pdf]

**Table S1: Soil samples names, land-use and CSIA results. stdev: standard deviation of triplicate measurements.**

| <b>Soil sample name</b> | <b>Land-use</b>     | <b>C24:0 mean</b> | <b>C24:0 stdev</b> | <b>C26:0 mean</b> | <b>C26:0 stdev</b> | <b>C28:0 mean</b> | <b>C28:0 stdev</b> |
|-------------------------|---------------------|-------------------|--------------------|-------------------|--------------------|-------------------|--------------------|
| Aa                      | Arable land         | -34.24            | 0.28               | -34.73            | 0.02               | -35.85            | 0.38               |
| Ab                      | Arable land         | -32.83            | 0.10               | -34.30            | 0.23               | -35.33            | 0.29               |
| Ac                      | Arable land         | -32.25            | 0.37               | -34.22            | 0.46               | -35.37            | 0.49               |
| Ad                      | Arable land         | -31.50            | 0.21               | -33.85            | 0.08               | -35.23            | 0.12               |
| Fa                      | Forest (mixed)      | -32.59            | 0.19               | -34.26            | 0.19               | -35.32            | 0.09               |
| Fb                      | Forest (mixed)      | -34.00            | 0.41               | -34.45            | 0.31               | -34.10            | 0.49               |
| Fc                      | Forest (mixed)      | -32.58            | 0.14               | -33.43            | 0.04               | -34.42            | 0.17               |
| Fd                      | Forest (mixed)      | -32.51            | 0.08               | -33.10            | 0.36               | -33.89            | 0.50               |
| Fe                      | Forest (mixed)      | -33.10            | 0.10               | -33.87            | 0.06               | -34.63            | 0.11               |
| Oa                      | Orchard             | -32.84            | 0.41               | -34.14            | 0.15               | -35.05            | 0.29               |
| Ob                      | Orchard             | -33.24            | 0.18               | -34.43            | 0.12               | -35.01            | 0.09               |
| Oc                      | Orchard             | -33.21            | 0.47               | -34.55            | 0.35               | -35.29            | 0.15               |
| Od                      | Orchard             | -32.43            | 0.47               | -33.29            | 0.26               | -34.52            | 0.29               |
| Oe                      | Orchard             | -33.51            | 0.16               | -34.83            | 0.15               | -35.16            | 0.33               |
| PGa                     | Permanent grassland | -35.00            | 0.31               | -35.71            | 0.29               | -37.10            | 0.18               |
| PGb                     | Permanent grassland | -34.51            | 0.49               | -35.56            | 0.48               | -36.15            | 0.17               |
| PGc                     | Permanent grassland | -34.11            | 0.41               | -35.23            | 0.16               | -36.32            | 0.25               |
| TGa                     | Temporary grassland | -34.34            | 0.18               | -35.58            | 0.12               | -36.73            | 0.27               |
| TGb                     | Temporary grassland | -33.74            | 0.14               | -35.06            | 0.21               | -36.64            | 0.15               |
| TGc                     | Temporary grassland | -34.83            | 0.16               | -35.68            | 0.30               | -36.33            | 0.45               |
| TGd                     | Temporary grassland | -33.23            | 0.26               | -34.90            | 0.37               | -36.30            | 0.31               |

**Table S2: Lake sediment core samples depth, age, and CSIA results. stdev: standard deviation of triplicate measurements.**

| <b>Depth (mm)</b> | <b>Age CE</b>    | <b>C24:0<br/>mean</b> | <b>C24:0<br/>stdev</b> | <b>C26:0<br/>mean</b> | <b>C26:0<br/>stdev</b> | <b>C28:0<br/>mean</b> | <b>C28:0<br/>stdev</b> |
|-------------------|------------------|-----------------------|------------------------|-----------------------|------------------------|-----------------------|------------------------|
| 000-009           | Post-1995        | -36.27                | 0.38                   | -34.39                | 0.22                   | -34.75                | 0.08                   |
| 018-027           | Post-1995        | -35.20                | 0.29                   | -34.20                | 0.29                   | -34.66                | 0.30                   |
| 042-052           | 1989-1992        | -33.90                | 0.49                   | -33.53                | 0.45                   | -34.83                | 0.39                   |
| 061-077           | 1982-1985        | -36.01                | 0.23                   | -34.65                | 0.50                   | -34.63                | 0.26                   |
| 092-100           | 1976-1978        | -37.74                | 0.50                   | -34.25                | 0.22                   | -34.36                | 0.38                   |
| 111-128           | 1970-1972        | -33.68                | 0.44                   | -33.69                | 0.32                   | -36.11                | 0.35                   |
| 142-157           | 1964-1966        | -33.34                | 0.34                   | -33.59                | 0.28                   | -37.81                | 0.12                   |
| 164-173           | 1957-1960        | -32.94                | 0.20                   | -33.76                | 0.28                   | -34.11                | 0.48                   |
| 175-184           | 1956 (Turbidite) | -33.34                | 0.18                   | -33.14                | 0.42                   | -32.92                | 0.25                   |
| 193-204           | 1950-1952        | -36.71                | 0.50                   | -33.95                | 0.33                   | -34.34                | 0.16                   |
| 211-225           | 1944-1946        | -36.26                | 0.46                   | -33.96                | 0.29                   | -34.04                | 0.13                   |
| 234-245           | 1938-1940        | -37.83                | 0.50                   | -35.61                | 0.39                   | -35.86                | 0.14                   |
| 259-270           | 1932-1934        | -39.03                | 0.49                   | -36.05                | 0.44                   | -35.63                | 0.38                   |
| 283-295           | 1926-1928        | -38.94                | 0.45                   | -37.50                | 0.34                   | -35.91                | 0.13                   |
| 305-315           | 1920-1922        | -38.70                | 0.42                   | -35.64                | 0.14                   | -35.06                | 0.16                   |
| 325-333           | 1914-1916        | -40.10                | 0.48                   | -36.58                | 0.25                   | -36.34                | 0.42                   |
| 345-353           | 1908-1910        | -39.13                | 0.37                   | -37.76                | 0.23                   | -36.02                | 0.12                   |
| 363-370           | 1902-1904        | -36.05                | 0.28                   | -37.27                | 0.33                   | -35.83                | 0.47                   |
| 381-389           | 1896-1898        | -35.65                | 0.33                   | -35.77                | 0.16                   | -33.63                | 0.50                   |
| 399-406           | 1890-1892        | -35.16                | 0.40                   | -35.00                | 0.37                   | -33.55                | 0.28                   |
| 415-418           | 1885-1886        | -36.25                | 0.23                   | -35.85                | 0.39                   | -34.70                | 0.27                   |
| 440-453           | Pre-1885         | -35.30                | 0.44                   | -35.23                | 0.19                   | -34.07                | 0.33                   |

**Table S3: Orchard composition and age, defined from aerial pictures.**

| <b>Orchard name</b> | <b>Type of tree</b> | <b>Plot used as orchard since...</b> |
|---------------------|---------------------|--------------------------------------|
| Oa                  | Pear trees          | Less than 10 years                   |
| Ob                  | Vines               | 25 years                             |
| Oc                  | Apple trees         | 20 years                             |
| Od                  | Apple trees         | 20 years                             |
| Oe                  | Apple trees         | 40 years                             |
